# Supplementary material for: Aqueous phase fabrication and conversion of Pb(OH)Br into a CH3NH3PbBr3 perovskite and its application in resistive memory switching devices
Source: Royal Society of Chemistry journal article supplement (doi:10.1039/d0gc00878h), 2020-01-01
Supplement: d0gc00878h1.pdf [file d0gc00878h1.pdf]

Electronic supplementary materials

**Aqueous Phase Fabrication and Conversion of Pb(OH)Br into CH<sub>3</sub>NH<sub>3</sub>PbBr<sub>3</sub> Perovskite and its Application in Resistive Memory Switching Devices**

Sanam Attique<sup>a</sup>, Nasir Ali<sup>b</sup>, Rabia Khatoon<sup>c</sup>, Akmal Abbas<sup>d</sup>, Shahid Ali<sup>e</sup>, Yangchun Yu<sup>a</sup>, Jiahui Hou<sup>a</sup>, Bingqiang Cao<sup>ff</sup>, Huizhen Wu<sup>b†</sup>, and Shikuan Yang<sup>a†</sup>

<sup>a</sup>Institute for Composites Science Innovation (InCSI), School of Materials Science and Engineering, Zhejiang University, Hangzhou, 310027, P.R. China

<sup>b</sup>Zhejiang Province Key Laboratory of Quantum Technology and Devices and Department of Physics, State Key Laboratory for Silicon Materials, Zhejiang University, Hangzhou, 310027, P.R. China

<sup>c</sup>State Key Laboratory of Silicon Materials, School of Materials Science and Engineering, Zhejiang University, Hangzhou, 310027, P.R. China

<sup>d</sup>State Key Laboratory of Fine Chemicals, PSU-DUT Joint Center for Energy Research, School of Chemical Engineering, Dalian University of Technology, Dalian, 116024, PR China

<sup>e</sup>Materials Research Laboratory, Department of Physics, University of Peshawar, Peshawar 25120, Pakistan

<sup>f</sup>School of Physics and Physical Engineering, Qufu Normal University, Qufu 273165, China

**\*Corresponding authors**

Email address: mse\_caobq@ujn.edu.cn (Prof. Bingqiang Cao), hzwu@zju.edu.cn (Prof. Huizhen Wu), and shkyang@zju.edu.cn (Prof. Shikuan Yang)

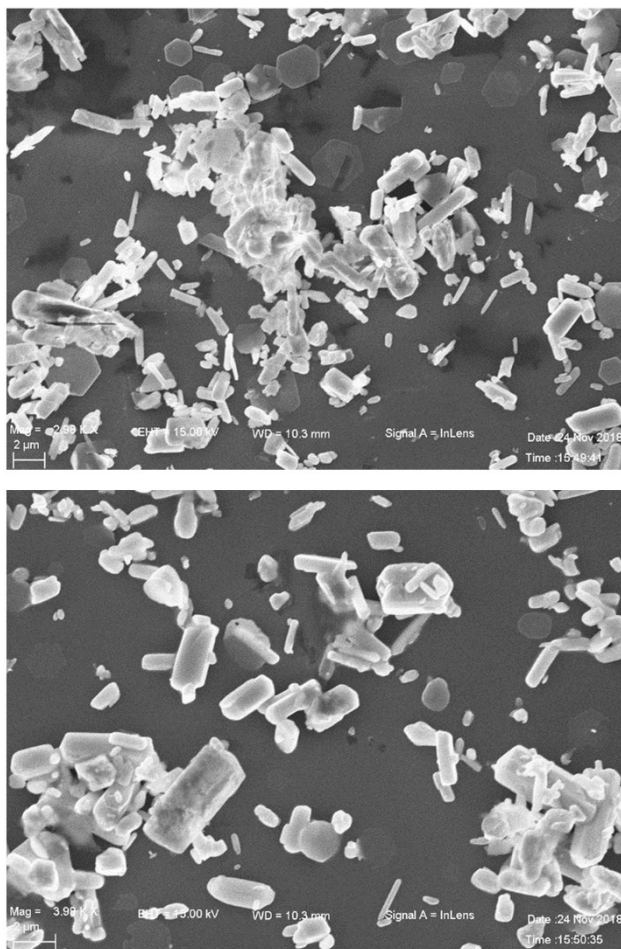

**Figure S1** SEM images of the as-prepared Pb(OH)Br crystals dispersed on the glass substrate.

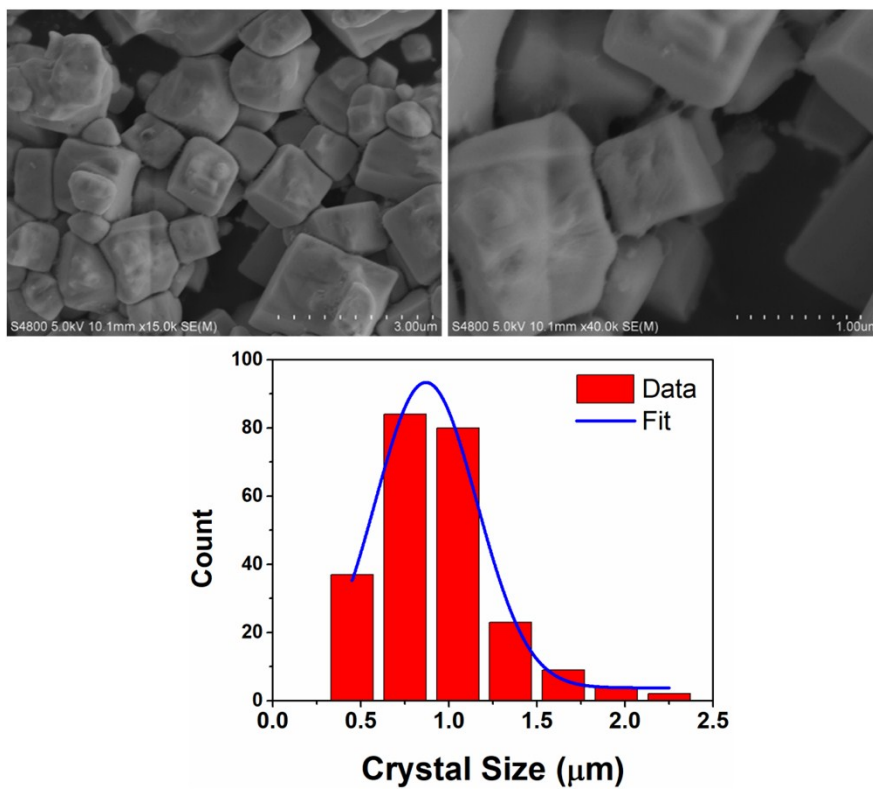

**Figure S2** SEM images of the as-prepared MAPbBr<sub>3</sub> crystals and the corresponding size distribution histogram.

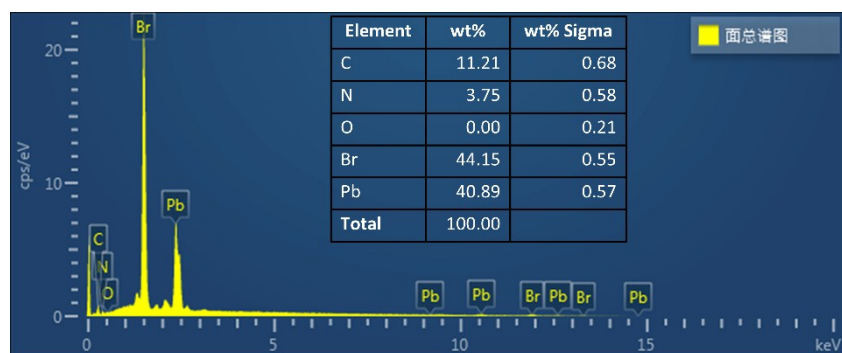

**Figure S3** EDS analysis of the MAPbBr<sub>3</sub> perovskites.

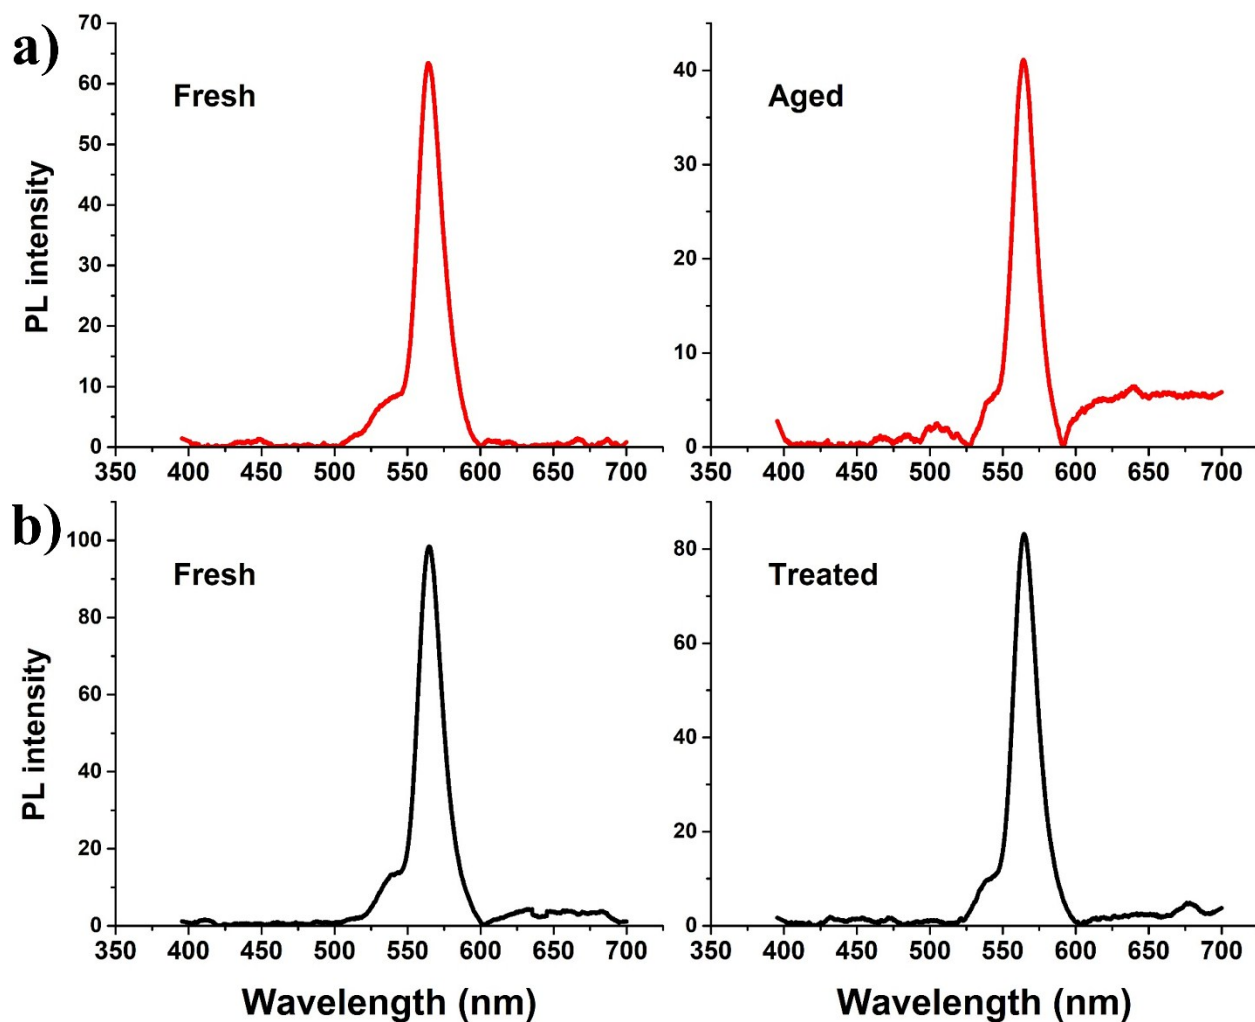

**Figure S4** (a) PL spectra of the as-prepared MAPbBr<sub>3</sub> and after being exposed to a humid environment with a relative humidity of 60±10% for 40 days. (b) PL spectra of the as-prepared MAPbBr<sub>3</sub> and therally treated at 90 °C for 60 h.

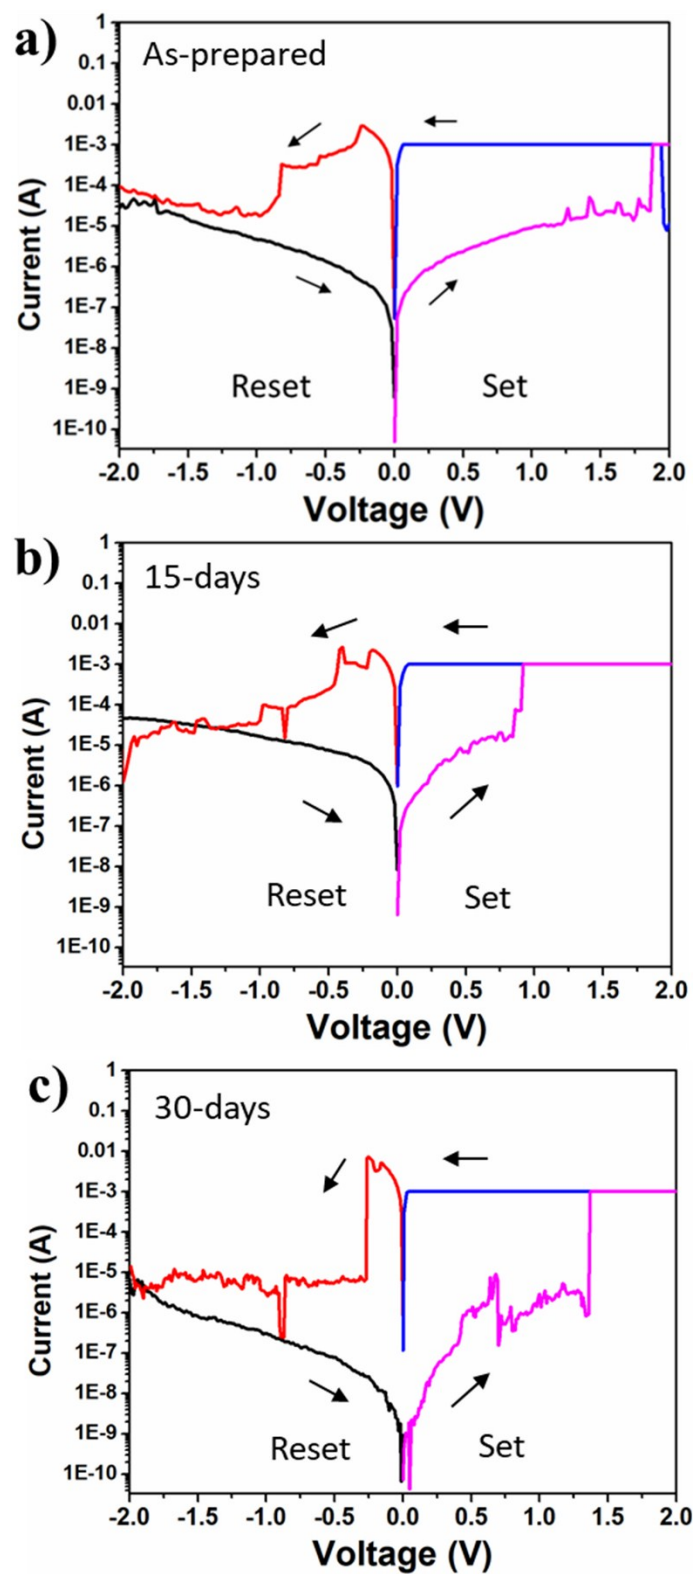

**Figure S5** I-V characteristics of the as-prepared and the aged ReRAM device. (a) As-prepared. (b) Aged for 15 days. (c) Aged for 30 days.
